# Supplementary material for: Podocyte-specific RAP1GAP expression contributes to focal segmental glomerulosclerosis–associated glomerular injury
Source: JCI journal article supplement (doi:10.1172/jci67846), 2014-03-18
Supplement: sd1 [file 1]

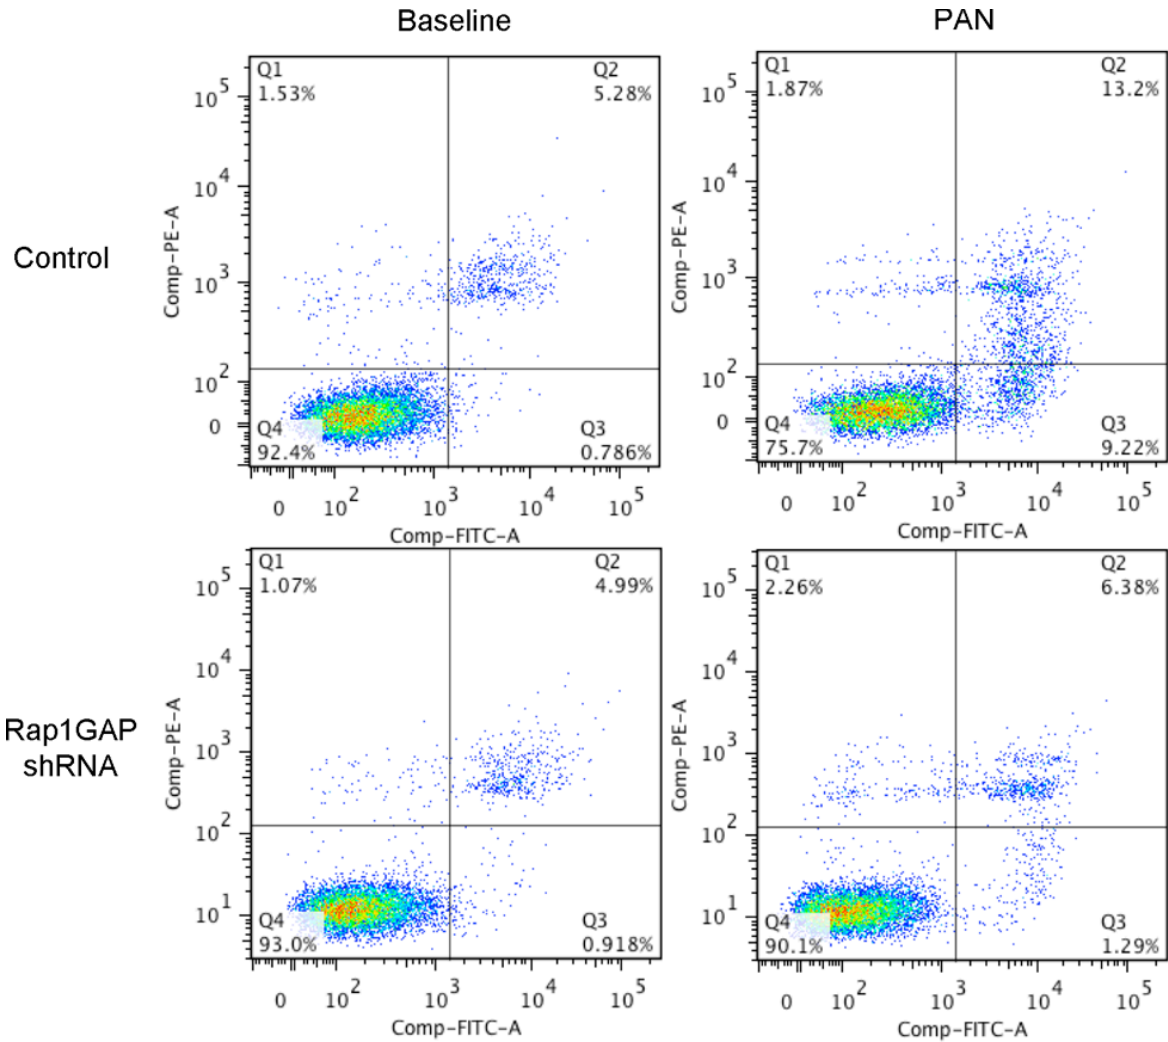

### Supplementary Figure 1

Rap1GAP silenced podocytes are dramatically protected from apoptosis compared to control podocytes. Annexin V and propidium iodide staining are analyzed with FACS to compare the apoptosis and necrosis induced by exposure to PAN (25 µg/ml) for 36 hours. After exposure to PAN, the percentage of early apoptotic cells (Q3) and necrotic cells (Q2) are markedly decreased in Rap1GAP silenced cells compared to controls.
